# Supplementary material for: Microfluidic curved-channel centrifuge for solution exchange of target microparticles and their simultaneous separation from bacteria
Source: Royal Society of Chemistry journal article supplement (doi:10.1039/c8sm00162f), 2018-01-01
Supplement: c8sm00162f1.pdf [file c8sm00162f1.pdf]

## Supplementary Information

### **Microfluidic Curved-Channel Centrifuge for Solution Exchange of Target Microparticles and their Simultaneous Separation from Bacteria**

Pouriya Bayat and Pouya Rezai\*

Department of Mechanical Engineering, York University, Toronto, ON, Canada

\* Corresponding author: BRG 433B, 4700 Keele St, Toronto, ON, M3J 1P3, Canada; Tel: +1-416-736-2100 Ext. 44703; Email: [prezai@yorku.ca](mailto:prezai@yorku.ca)

Electronic Supplementary Information (ESI) available: See DOI: 10.1039/x0xx00000x

#### **Supplementary Figure 1**

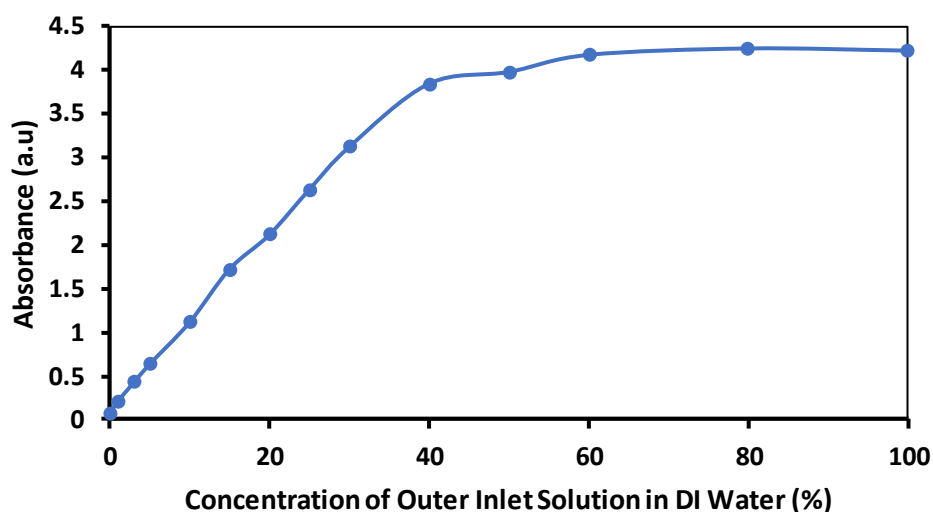

*Fig. S1. Absorbance vs. concentration of the outer inlet solution (i.e. 10% Trypan blue in DI water) in DI water. A linear function ( $y=0.0963x+0.1525$ ) was fitted over 0-40% data points with  $R^2=0.9959$ . The absorbance of the inner outlet sample along with the fitted curve were used to calculate the purity of the solution.*

**Supplementary Movie 1.** Switching of water and Trypan blue at  $Q_1=Q_2= 1 \text{ mL}\cdot\text{min}^{-1}$ .
